# Supplementary material for: Prophylactic Topical Antibiotics in Fracture Repair and Spinal Fusion
Source: Adv Orthop. 2021 Oct 14;2021:1949877. doi: 10.1155/2021/1949877 (PMC8531801; doi:10.1155/2021/1949877)
Supplement: Supplementary Materials — Appendix A. Search strategy used for Pubmed, Embase, and Web of Knowledge databases. Appendix B. Forest plot of pooled infection data of fracture studies with subgroup analysis by antibiotic type. [file 1949877.f1.zip]

Archive with 2 entries (2 files):
- Appendix A (1).docx
- Appendix B.eps
